# Supplementary material
Source: MDPI journal article supplement (https://www.mdpi.com/2073-4441/15/9/1684)
Supplement: s1 [file s1]

## Supplementary Materials

### 1. Trend analysis test results

#### 1.1 Tocantins- Araguaia Watershed

**Table S1.** Tocantins-Araguaia Watershed parameters trend tests results. When the Mann-Kendall test had significant results, the WAKV test was not performed. Confidence A confidence interval of 95% was considered

| Tocantins-Araguaia Watershed parameters | Trend test   | 2000 - 2020                                              | 2000-2010                                                  | 2010 - 2020                                               |
|-----------------------------------------|--------------|----------------------------------------------------------|------------------------------------------------------------|-----------------------------------------------------------|
| Reservoirs sum area                     | Mann-Kendall | tau = 0.58; p-value = 2.58E-04*                          | tau = 0.78, p-value = 1.08E-03*                            | tau = -0.09, p-value = 0.75                               |
|                                         | WAKV test    | -                                                        | -                                                          | test statistic = 0.20, moving window = 5, p-value = 0.84  |
| Precipitation                           | Mann-Kendall | tau = -0.30, p-value = 0.06                              | tau = 0.05, p-value = 0.88                                 | tau = -0.31, p-value = 0.21                               |
|                                         | WAKV test    | test statistic = 0.80, moving window = 5, p-value = 0.34 | test statistic = -0.39, moving window = 5, p-value = 0.64  | test statistic = 0.02, moving window = 5, p-value = 0.99  |
| Urban area                              | Mann-Kendall | tau = 1, p-value = < 2.22E-16*                           | tau = 1, p-value = 2.62E-05*                               | tau = 1, p-value = 2.62E-05*                              |
|                                         | WAKV test    | -                                                        | -                                                          | -                                                         |
| Natural area                            | Mann-Kendall | tau = -1, p-value = 2.77E-10*                            | tau = -1, p-value = 2.62E-05*                              | tau = -1, p-value = 2.62E-05*                             |
|                                         | WAKV test    | -                                                        | -                                                          | -                                                         |
| Agriculture area                        | Mann-Kendall | tau = 0.99, p-value = < 2.22E-16*                        | tau = 0.96, p-value = 5.16E-05*                            | tau = 1, p-value = 2.62E-05*                              |
|                                         | WAKV test    | -                                                        | -                                                          | -                                                         |
| Pasture area                            | Mann-Kendall | tau = 0.71, p-value = 6.80E-06*                          | tau = 1, p-value = 2.6226E-05*                             | tau = 0.09, p-value = 0.76*                               |
|                                         | WAKV test    | -                                                        | -                                                          | -                                                         |
| Upstream reservoir discharge            | Mann-Kendall | tau = -0.29, p-value = 0.07                              | tau = -0.09, p-value = 0.75                                | tau = -0.34, p-value = 0.008*                             |
|                                         | WAKV test    | test statistic = 2.91, moving window = 5, p-value = 0.31 | test statistic = -0.19, moving window = 5, p-value = 0.89  | -                                                         |
| Downstream reservoir discharge          | Mann-Kendall | tau = -0.35, p-value = 0.03*                             | tau = -0.16, p-value = 0.53                                | tau = -0.35, p-value = 0.16                               |
|                                         | WAKV test    | -                                                        | test statistic = -0.54, moving window = 5, p-value = 0.01* | test statistic = 1.00, moving window = 5, p-value = 0.03* |
| Liquid Evaporation                      | Mann-Kendall | tau = -0.32, p-value = 0.04*                             | tau = -0.24, p-value = 0.35                                | tau = -0.2, p-value = 0.44                                |
|                                         | WAKV test    | -                                                        | test statistic = -0.54, moving window = 5, p-value = 1     | test statistic = -0.58, moving window = 5, p-value = 0.33 |

\* Significant trend.

## 1.2 Reservoir Cascade System

**Table S2.** Reservoir parameters trend tests results for Serra da Mesa, Cana Brava, and São Salvador reservoirs from the initial monitored year of each to 2020. When the Mann-Kendall test had significant results, the WAKV test was not performed. Confidence A confidence interval of 95% was considered

| Reservoirs parameters | Trend test   | Serra da Mesa (2000 - 2020)                               | Cana Brava (2003 - 2020)                                   | São Salvador (2009 - 2020)                                |
|-----------------------|--------------|-----------------------------------------------------------|------------------------------------------------------------|-----------------------------------------------------------|
| Reservoir area        | Mann-Kendall | tau = -0.19, p-value =0.24                                | tau = -0.37, p-value = 0.03*                               | tau = -0.58, p-value = 0.01*                              |
|                       | WAKV test    | test statistic = 21.05, moving window = 5, p-value = 0.07 | -                                                          | -                                                         |
| Reservoir discharge   | Mann-Kendall | tau = -0.29, p-value =0.08                                | tau = -0.26, p-value =0.15                                 | tau = -0.52, p-value = 0.02*                              |
|                       | WAKV test    | test statistic = 2.91, moving window = 5, p-value = 0.30  | test statistic = 5.33, moving window = 5, p-value = 0.13   | -                                                         |
| Liquid Evaporation    | Mann-Kendall | tau = -0.39, p-value =0.01*                               | tau = -0.03, p-value = 0.91                                | tau = -0.05, p-value = 0.89                               |
|                       | WAKV test    | -                                                         | test statistic = -1.00, moving window = 5, p-value = 0.12  | test statistic = -0.76, moving window = 5, p-value = 0.34 |
| Precipitation         | Mann-Kendall | tau = -0.12, p-value =0.47                                | tau = -0.16, p-value = 0.36                                | tau = -0.27, p-value = 0.24                               |
|                       | WAKV test    | test statistic = 0.24, moving window = 5, p-value = 0.83  | test statistic = -0.23, moving window = 5, p-value = 0.84  | test statistic = -0.11, moving window = 5, p-value = 0.94 |
| Urban area            | Mann-Kendall | tau = 1, p-value =< 2.22E-16*                             | tau = 0.95, p-value =< 2.22E-16*                           | tau = 0.94, p-value = 2.87E-05*                           |
|                       | WAKV test    | -                                                         | -                                                          | -                                                         |
| Natural area          | Mann-Kendall | tau = -0.95, p-value =1.87E-09*                           | tau = -0.61, p-value = 4.93E-04*                           | tau = -0.91, p-value = 5.22E-05*                          |
|                       | WAKV test    | -                                                         | -                                                          | -                                                         |
| Agriculture area      | Mann-Kendall | tau = 0.99, p-value =< 2.22E-16*                          | tau = 0.09, p-value =0.65                                  | tau = 0.97, p-value = 1.56E-05*                           |
|                       | WAKV test    | -                                                         | test statistic = 13.11, moving window = 5, p-value = 0.01* | -                                                         |
| Pasture area          | Mann-Kendall | tau = -0.91, p-value =8.04E-09*                           | tau = 0.40, p-value = 0.02*                                | tau = -0.52, p-value =0.02*                               |
|                       | WAKV test    | -                                                         | -                                                          | -                                                         |

\* Significant trend.

**Table S3.** Reservoir parameters trend tests for Peixe Angical, Luís Eduardo Magalhães/Lajeado, Estreito, and Tucuruí reservoirs from the initial monitored year of each to 2020. When the Mann-Kendall test had significant results, the WAKV test was not performed. Confidence A confidence interval of 95% was considered. For the Estreito reservoir, only Mann-Kendall tests were made due to the small sample size

| Reservoirs parameters | Trend test   | Peixe Angical (2006-2020)                                    | Luís Eduardo Magalhães/Lajeado (2002-2020)                    | Estreito (2012 – 2020)          | Tucuruí (2000 - 2020)                                     |
|-----------------------|--------------|--------------------------------------------------------------|---------------------------------------------------------------|---------------------------------|-----------------------------------------------------------|
| Reservoir area        | Mann-Kendall | tau = -0.49, p-value = 0.01*                                 | tau = -0.47, p-value = 5.13E-03*                              | tau = -0.61, p-value = 0.03*    | tau = 0.25, p-value = 0.12                                |
|                       | WAKV test    | -                                                            | -                                                             | -                               | test statistic = -0.10, moving window = 5, p-value = 0.94 |
| Reservoir discharge   | Mann-Kendall | tau = -0.37, p-value = 0.06                                  | tau = -0.44, p-value = 0.01*                                  | tau = -0.39, p-value = 0.17     | tau = -0.35, p-value = 0.03*                              |
|                       | WAKV test    | test statistic = -1.05, moving window = 11, p-value = 0.045* | -                                                             | -                               | -                                                         |
| Liquid Evaporation    | Mann-Kendall | tau = -0.25, p-value = 0.22                                  | tau = -0.41, p-value = 0.02*                                  | tau = 0.14, p-value = 0.67      | tau = 0.20, p-value = 0.22                                |
|                       | WAKV test    | test statistic = -0.91, moving window = 5, p-value = 0.13    | -                                                             | -                               | test statistic = -0.56, moving window = 5, p-value = 0.57 |
| Precipitation         | Mann-Kendall | tau = -0.2, p-value = 0.32                                   | tau = -0.19, p-value = 0.26                                   | tau = 0.22, p-value = 0.46      | tau = -0.19, p-value = 0.25                               |
|                       | WAKV test    | test statistic = 0.04, moving window = 5, p-value = 0.98     | test statistic = 0.53, moving window = 5, p-value = 0.61      | -                               | test statistic = -0.81, moving window = 5, p-value = 0.35 |
| Urban area            | Mann-Kendall | tau = 1, p-value = 2.38E-07*                                 | tau = 1, p-value = < 2.22E-16*                                | tau = 1, p-value = 2.63E-04*    | tau = 1, p-value = < 2.22E-16*                            |
|                       | WAKV test    | -                                                            | -                                                             | -                               | -                                                         |
| Natural area          | Mann-Kendall | tau = -0.94, p-value = 1.24E-06*                             | tau = -1, p-value = 2.72E-09*                                 | tau = -1, p-value = 2.63E-04*   | tau = -0.96, p-value = 1.28E-09*                          |
|                       | WAKV test    | -                                                            | -                                                             | -                               | -                                                         |
| Agriculture area      | Mann-Kendall | tau = 0.54, p-value = 5.58E-03*                              | tau = 0.89, p-value = 1.19E-07*                               | tau = 0.56, p-value = 0.047*    | tau = 0.64, p-value = 5.91E-05*                           |
|                       | WAKV test    | -                                                            | -                                                             | -                               | -                                                         |
| Pasture area          | Mann-Kendall | tau = 0.51, p-value = 0.01*                                  | tau = -0.06, p-value = 0.73                                   | tau = 0.94, p-value = 5.81E-04* | tau = 0.95, p-value = < 2.22E-16*                         |
|                       | WAKV test    | -                                                            | test statistic = 13.39, moving window = 5, p-value < 2.2E-16* | -                               | -                                                         |

\* Significant trend.

**Table S4.** Reservoir parameters trend tests results from 2000 to 2010 for the only two reservoirs that were flooded during this entire period, Serra da Mesa and Tucuruí reservoirs. When the Mann-Kendall test had significant results, the WAKV test was not performed. Confidence A confidence interval of 95% was considered.

| Reservoirs parameters | Trend test   | Serra da Mesa (2000-2010)                                 | Tucuruí (2000-2010)                                             |
|-----------------------|--------------|-----------------------------------------------------------|-----------------------------------------------------------------|
| Reservoir area        | Mann-Kendall | tau = 0.53, p-value = 0.03*                               | tau = 0.81, p-value = 0.81                                      |
|                       | WAKV test    | -                                                         | test statistic = -0.27, moving window = 8, p-value = < 2.2e-16* |
| Reservoir discharge   | Mann-Kendall | tau = -0.09, p-value = 0.75                               | tau = -0.16, p-value = 0.53                                     |
|                       | WAKV test    | test statistic = -0.18, moving window = 5, p-value = 0.86 | test statistic = -0.54, moving window = 5, p-value = 0.009*     |
| Liquid Evaporation    | Mann-Kendall | tau = -0.05, p-value = 0.88                               | tau = 0.16, p-value = 0.53                                      |
|                       | WAKV test    | test statistic = -0.73, moving window = 5, p-value = 0.17 | test statistic = -0.70, moving window = 5, p-value = 0.95       |
| Precipitation         | Mann-Kendall | tau = 0.31, p-value = 0.21                                | tau = 0.02, p-value = 1                                         |
|                       | WAKV test    | test statistic = -0.46, moving window = 5, p-value = 0.58 | test statistic = -0.37, moving window = 5, p-value = 0.71       |
| Urban area            | Mann-Kendall | tau = 1, p-value = 2.62E-05*                              | tau = 1, p-value = 2.62E-05*                                    |
|                       | WAKV test    | -                                                         | -                                                               |
| Natural area          | Mann-Kendall | tau = -0.85, p-value = 3.42E-04*                          | tau = -1, p-value = 2.62E-05*                                   |
|                       | WAKV test    | -                                                         | -                                                               |
| Agriculture area      | Mann-Kendall | tau = 0.96, p-value = 5.16E-05*                           | tau = 0.75, p-value = 0.002*                                    |
|                       | WAKV test    | -                                                         | -                                                               |
| Pasture area          | Mann-Kendall | tau = 0.78, p-value = 0.001*                              | tau = 1, p-value = 2.62E-05*                                    |
|                       | WAKV test    | -                                                         | -                                                               |

\* Significant trend.

**Table S5.** Reservoir parameters trend tests results for Serra da Mesa, Cana Brava, and São Salvador reservoirs from 2010 to 2020. When the Mann-Kendall test had significant results, the WAKV test was not performed. Confidence A confidence interval of 95% was considered

| Reservoirs parameters | Trend test                | Serra da Mesa (2010 - 2020)                                                             | Cana Brava (2010 - 2020)                                                                   | São Salvador (2010 - 2020)                                                               |
|-----------------------|---------------------------|-----------------------------------------------------------------------------------------|--------------------------------------------------------------------------------------------|------------------------------------------------------------------------------------------|
| Reservoir area        | Mann-Kendall<br>WAKV test | tau = -0.6, p-value =0.01*<br>-                                                         | tau = -0.53, p-value = 0.03*<br>-                                                          | tau = -0.89, p-value = 1.86E-04*<br>-                                                    |
| Reservoir discharge   | Mann-Kendall<br>WAKV test | tau = -0.64, p-value = 0.008*<br>-                                                      | tau = 0.71, p-value = 0.003*<br>-                                                          | tau = -0.71, p-value = 0.003*<br>-                                                       |
| Liquid Evaporation    | Mann-Kendall<br>WAKV test | tau = -0.67, p-value = 0.005*<br>-                                                      | tau = 0.16, p-value = 0.53<br>test statistic = -0.58, moving window = 5, p-value = 0.37    | tau = -0.22, p-value = 0.39<br>test statistic = -0.76, moving window = 5, p-value = 0.13 |
| Precipitation         | Mann-Kendall<br>WAKV test | tau = -0.31, p-value = 0.21<br>test statistic = 0.22, moving window = 5, p-value = 0.85 | tau = 0.05, p-value = 0.88<br>test statistic = -0.44, moving window = 5, p-value = 0.62    | tau = -0.12, p-value = 0.64<br>test statistic = -0.34, moving window = 5, p-value = 0.69 |
| Urban area            | Mann-Kendall<br>WAKV test | tau = 1, p-value =< 2.62E-16*<br>-                                                      | tau 0.89, p-value = 1.86E-04*<br>-                                                         | tau = 0.93, p-value = 9.92E-05*<br>-                                                     |
| Natural area          | Mann-Kendall<br>WAKV test | tau = -0.96, p-value = 5.16E-05*<br>-                                                   | tau = -0.89, p-value = 1.86E-04*<br>-                                                      | tau = -0.89, p-value = 1.86E-04*<br>-                                                    |
| Agriculture area      | Mann-Kendall<br>WAKV test | tau = 1, p-value =< 2.62E-05*<br>-                                                      | tau = 0.53, p-value =0.03*<br>-                                                            | tau = 1, p-value = 2.62E-05*<br>-                                                        |
| Pasture area          | Mann-Kendall<br>WAKV test | tau = -0.89, p-value = 1.86E-04*<br>-                                                   | tau = 0.31, p-value = 0.21<br>test statistic = 2.65, moving window = 5, p-value < 2.2E-16* | tau = -0.64, p-value = 0.008*<br>-                                                       |

\* Significant trend.

**Table S6.** Reservoir parameters trend tests results in Peixe Angical, Luís Eduardo Magalhães/Lajeado, and Tucuruí from 2010 to 2020. When the Mann-Kendall test had significant results, the WAKV test was not performed. Confidence A confidence interval of 95% was considered. Estreito reservoir was not included since it was only built after the start of the considered period, and its information can be found in Table S3

| Reservoirs parameters | Trend test   | Peixe Angical (2010-2020)                                      | Luís Eduardo Magalhães/Lajeado (2010-2020)                      | Tucuruí (2010 - 2020)                                      |
|-----------------------|--------------|----------------------------------------------------------------|-----------------------------------------------------------------|------------------------------------------------------------|
| Reservoir area        | Mann-Kendall | tau = -0.2, p-value = 0.44                                     | tau = -0.42, p-value = 0.09                                     | tau = 0.49, p-value = 0.04*                                |
|                       | WAKV test    | test statistic = -0.86, moving window = 7, p-value = 0.02*     | test statistic = -0.19, moving window = 9, p-value = < 2.2E-16* | -                                                          |
| Reservoir discharge   | Mann-Kendall | tau = -0.6, p-value = 0.01*                                    | tau = -0.53, p-value = 0.03*                                    | tau = -0.35, p-value = 0.16                                |
|                       | WAKV test    | -                                                              | -                                                               | test statistic = 1.59, moving window = 4, p-value = 0.02*  |
| Liquid Evaporation    | Mann-Kendall | tau = -0.15, p-value = 0.58                                    | tau = -0.04, p-value = 0.94                                     | tau = 0.13, p-value = 0.64                                 |
|                       | WAKV test    | test statistic = -0.96, moving window = 5, p-value = 0.07      | test statistic = -0.57, moving window = 5, p-value = 0.48       | test statistic = -0.31, moving window = 5, p-value = 0.73  |
| Precipitation         | Mann-Kendall | tau = -0.12, p-value = 0.64                                    | tau = -0.27, p-value = 0.28                                     | tau = 0.02, p-value = 1                                    |
|                       | WAKV test    | test statistic = -0.20, moving window = 5, p-value = 0.88      | test statistic = -0.01, moving window = 5, p-value = 0.99       | test statistic = 0.68, moving window = 5, p-value = 0.22   |
| Urban area            | Mann-Kendall | tau = 1, p-value = 2.62E-05*                                   | tau = 1, p-value = 2.62E-16*                                    | tau = 1, p-value = 2.62E-05*                               |
|                       | WAKV test    | -                                                              | -                                                               | -                                                          |
| Natural area          | Mann-Kendall | tau = -0.89, p-value = 1.86E-04*                               | tau = -1, p-value = 2.62E-09*                                   | tau = -0.86, p-value = 3.42E-04*                           |
|                       | WAKV test    | -                                                              | -                                                               | -                                                          |
| Agriculture area      | Mann-Kendall | tau = 0.27, p-value = 0.28                                     | tau = 1, p-value = 2.62*                                        | tau = -0.16, p-value = 0.87                                |
|                       | WAKV test    | test statistic = 1.04, moving window = 5, p-value = 0.49       | -                                                               | test statistic = -1.64, moving window = 7, p-value = 0.02* |
| Pasture area          | Mann-Kendall | tau = 0.35, p-value = 0.16                                     | tau = -0.89, p-value = 1.86E-04*                                | tau = 0.8, p-value = 6.14E-04*                             |
|                       | WAKV test    | test statistic = 4.67, moving window = 5, p-value = < 2.2E-16* | -                                                               | -                                                          |

\* Significant trend.

## 2. Correlation tables

### 2.1 Tocantins-Araguaia Watershed

**Table S7.** Correlation of Tocantins-Araguaia Watershed parameters to the sum of reservoirs area. When the distribution of the data was normal, the test applied was the Pearson normality test, and when they were not normal, the Spearman normality test was used. Confidence The confidence interval of 95% was considered.

| Tocantins-Araguaia Watershed parameters |             | 2000 - 2020 | 2000-2010 | 2010 - 2020 |
|-----------------------------------------|-------------|-------------|-----------|-------------|
| Number of reservoirs                    | correlation | 0.77*       | 0.90*     | -0.07       |
|                                         | p-value     | 4,08E-02*   | 1.0E-4*   | 0.83        |
|                                         | method      | Spearman    | Spearman  | Spearman    |
| Upstream reservoir discharge            | correlation | -0.04       | -0.23     | 0.46        |
|                                         | p-value     | 0.88        | 0.50      | 0.15        |
|                                         | method      | Spearman    | Spearman  | Pearson     |
| Downstream reservoir discharge          | correlation | -0.19       | -0.19     | 0.58        |
|                                         | p-value     | 0.42        | 0.58      | 0.06        |
|                                         | method      | Spearman    | Spearman  | Pearson     |
| Liquid Evaporation                      | correlation | -0.40       | -0.46     | -0.02       |
|                                         | p-value     | 0.07        | 0.15      | 0.96        |
|                                         | method      | Spearman    | Spearman  | Pearson     |
| Precipitation                           | correlation | -0.13       | 0.16      | 0.35        |
|                                         | p-value     | 0.56        | 0.63      | 0.30        |
|                                         | method      | Spearman    | Spearman  | Pearson     |
| Urban area                              | correlation | 0.74*       | 0.93*     | -0.32       |
|                                         | p-value     | 1.0E-4*     | 2.2E-16*  | 0.34        |
|                                         | method      | Spearman    | Spearman  | Pearson     |
| Natural area                            | correlation | -0.74*      | -0.93*    | 0.31        |
|                                         | p-value     | 1.0E-4*     | 2.2E-16*  | 0.35        |
|                                         | method      | Spearman    | Spearman  | Pearson     |
| Agriculture area                        | correlation | 0.74*       | 0.93*     | -0.19       |
|                                         | p-value     | 1.0E-4*     | 2.2E-16*  | 0.58        |
|                                         | method      | Spearman    | Spearman  | Pearson     |
| Pasture area                            | correlation | 0.60*       | 0.93*     | -0.60*      |
|                                         | p-value     | 4.0E-3*     | 2.2E-16*  | 0,05*       |
|                                         | method      | Spearman    | Spearman  | Pearson     |

\* Significant correlation

### 2.2 Reservoir Cascade System

**Table S8.** Correlation of reservoir parameters to the reservoir area. When the distribution of the data was normal, the test applied was the Pearson normality test, and when they were not normal, the Spearman normality test was used. Confidence A confidence interval of 95% was considered..

| Reservoir parameters |             | Serra da Mesa | Cana Brava | São Salvador | Peixe Angical | Luís Eduardo<br>Magalhães/La-<br>jeado | Estreito | Tucuruí  |
|----------------------|-------------|---------------|------------|--------------|---------------|----------------------------------------|----------|----------|
| Reservoir discharge  | correlation | 0.59*         | 0.63*      | 0.91*        | 0.30          | 0.52*                                  | 0.27     | -0.42    |
|                      | p-value     | 4.99E-03*     | 0.01*      | 4.34E-05*    | 0.28          | 0.02*                                  | 0.49     | 0.06     |
|                      | method      | Pearson       | Pearson    | Pearson      | Pearson       | Spearman                               | Spearman | Pearson  |
| Liquid Evaporation   | correlation | 0.52*         | 0.18       | 0.41         | 0.44          | 0.16                                   | -0.01    | 0.09     |
|                      | p-value     | 0.02*         | 0.48       | 0.19         | 0.10          | 0.51                                   | 0.98     | 0.68     |
|                      | method      | Pearson       | Pearson    | Pearson      | Pearson       | Spearman                               | Spearman | Pearson  |
| Precipitation        | correlation | 0.41          | 0.14       | -0.16        | 0.11          | 0.28                                   | -0.63    | -0.09    |
|                      | p-value     | 0.07          | 0.59       | 0.62         | 0.70          | 0.25                                   | 0.08     | 0.70     |
|                      | method      | Pearson       | Pearson    | Pearson      | Pearson       | Spearman                               | Spearman | Pearson  |
| Urban area           | correlation | -0.39         | -0.54*     | -0.68*       | -0.74*        | -0.72*                                 | -0.80*   | 0.42     |
|                      | p-value     | 0.08          | 0.02*      | 0.02*        | 1.80E-03*     | 6.88E-04*                              | 0.01*    | 0.06     |
|                      | method      | Pearson       | Pearson    | Pearson      | Pearson       | Spearman                               | Spearman | Pearson  |
| Natural area         | correlation | 0.33          | 0.58*      | 0.54         | 0.68*         | 0.72*                                  | 0.80*    | -0.38    |
|                      | p-value     | 0.14          | 0.01*      | 0.07         | 4.85E-03*     | 6.88E-04*                              | 0.01*    | 0.09     |
|                      | method      | Pearson       | Pearson    | Pearson      | Pearson       | Spearman                               | Spearman | Spearman |
| Agriculture area     | correlation | -0.31         | -0.14      | -0.67*       | -0.26         | -0.70*                                 | -0.83*   | 0.11     |
|                      | p-value     | 0.17          | 0.57       | 0.02*        | 0.35          | 1.09E-03*                              | 0.01*    | 0.64     |
|                      | method      | Pearson       | Pearson    | Pearson      | Spearman      | Spearman                               | Pearson  | Spearman |
| Pasture area         | correlation | 0.22          | -0.50*     | 0.76*        | -0.75*        | 0.21                                   | -0.78*   | 0.37     |
|                      | p-value     | 0.34          | 0.04*      | 4.52E-03*    | 1.91E-03*     | 0.38                                   | 0.02*    | 0.10     |
|                      | method      | Pearson       | Spearman   | Pearson      | Spearman      | Spearman                               | Spearman | Spearman |

\* Significant correlation
